## Towards assessment of cork production through National Forest Inventories

Maria Pasalodos-Tato\*, Iciar Alberdi, Isabel Cañellas and Mariola Sánchez-González

Department of Selvicultura y Gestión Sistemas Forestales, Centro de Investigación Forestal, Instituto Nacional de Investigación y Tecnología Agraria y Alimentaria (INIA-CIFOR), Ctra. A Coruña, km 7.5, 28040 Madrid, Spain

\*Corresponding author. Tel: +34-91-347-41-81; Fax: +34-91-347-67-67; E-mail: pasalodos.maria@inia.es

Received 12 January 2017

The economic importance of cork in the Mediterranean region demands an accurate assessment of its production. Cork production is currently estimated by aggregating information provided by Regional Forest Services, but this approach results in a lack of robustness at the national level. The objective of the present study is to analyse the role of the Spanish National Forest Inventory (SNFI) as a potential source of data for quantifying cork weight at national level and the scope of National Forest Inventory data to define national trends in cork yield as well as to characterize the main types of cork producing forest stands in Spain. Data from the Second and Third SNFI are used together with the Spanish Forest Map. The results point to the suitability of SNFI to quantify cork production as long as the two main variables defining cork weight, namely cork thickness and debarking height, were correctly recorded in inventories. Although the Second SNFI complied with these requirements, from the Third SNFI the methodology changed, preventing the accurate estimation of cork weight. Based on this study recommendations are made to improve the estimation of cork weight at national level, e.g. to measure cork thickness in all the cork oaks in the plot and to take a sample of cork from the inventoried trees. This information would also make it possible to assess the cork quality in terms of cork thickness growth and to classify cork production in terms of suitability for producing high quality cork products.

### Introduction

Today, the importance of non-wood forest products (NWFPs) is beyond any doubt (Wolfslehner *et al.*, 2013). These goods are not only important from a recreational point of view, in close association with the traditional use of forests as a source of livelihood, but are also highly profitable from a commercial perspective (Masiero *et al.*, 2016). NWFP occupy an important place in the livelihood of rural communities through the sale of products as well as auto-consumption (Nasi *et al.*, 2002), the economic revenue created often being greater than that generated by timber production (Palahí *et al.*, 2009; Miina *et al.*, 2010; Pasalodos-Tato *et al.*, 2016). Additionally, some authors highlight the large unused potential of NWFP to support rural development and increase the income of land owners and rural enterprises (Ludvig *et al.*, 2016). In Europe, Christmas trees, fruits, berries and cork are the most important NWFPs from an economic standpoint (Forest Europe, UNECE and FAO, 2011). The EU accounts for 80 per cent of the worldwide production of cork (Pelli *et al.*, 2009; Sierra-Pérez *et al.*, 2015), with an area of ~1.7 million ha of cork oak forests, mainly in Portugal and Spain, generating revenues of 325 million euros at the European level (Pereira, 2011). In addition, cork oak stands play a key role in

the economies of the regions in which they are found, not only due to the direct economic benefits from cork production, but also because of indirect benefits derived from activities associated with this type of forests such as hunting, cattle grazing or other products such as firewood and acorns. In this context, it is important to have accurate estimates of cork production, not only for the industrial sector to establish business strategies but also to comply with international reporting requirements for Forest Europe and FAO (Forest Resource Assessment – FRA). Similarly, it is important to keep a continuous record of cork production at regional and national level so that the production trends shown by this commodity can be monitored. One possible approach to quantifying cork production would be to use National Forest Inventories (NFI), especially bearing in mind the multipurpose character they have acquired in recent years (Corona *et al.*, 2011; Alberdi *et al.*, 2017) as a tool to address the challenges posed by new environmental policies and the needs of society. Moreover, given the current effort being channelled towards harmonizing different indicators at European level (Winter *et al.*, 2008; Ståhl *et al.*, 2012; Tomppo and Schadauer, 2012) it would seem sensible to use this NFI data to estimate cork production and develop appropriate sustainability indicators for these forests at national level.

In Spain, national cork production is estimated by aggregating the information provided by Regional Forest Services. Therefore, greater robustness of the data at national level is needed. The Spanish National Forest Inventory (SNFI) provides consistent forest information, although it has never been used to estimate cork production. Within this framework, the first step towards quantifying cork production at national level is to analyse the information provided by the SNFI to test whether this type of data are suitable or at least to identify the limitations of SNFI data for this purpose. Additionally, it would be of interest to characterize the forest stands devoted to cork production. In Spain there are two main types of stands producing cork, namely 'cork oak stands' and *dehesas* (agro-silvopastoral systems). Cork oak stands are denser and the trees tend to be thinner than those in *dehesas*, which are open woodlands, but to date no definitive reference values based on quantitative analyses have been provided to characterize these stands properly. It is worth noting that the term 'cork production' refers to the cork that has been harvested. In this study, the focus is on the standing cork, which could be estimated using SNFI. Thus the term 'cork weight' is used to quantify the amount of cork under debarking height growing in the forests (i.e. able to be harvested) when the SNFI was performed.

The objectives of the present study are to: (i) analyse the suitability of SNFI for estimating cork weight at national level; (ii) test the role of SNFI in depicting trends in cork weight at national level and (iii) characterize the main types of forest stands that produce cork in Spain using SNFI and the Spanish Forest Map (SFM, MAAMA, 1997–2006) as information sources.

## Material and methods

### Dataset

Data from the Second (2SNFI, 1986–1996) and Third (3SNFI, 1997–2007) National Forest Inventories were used to conduct the present study. The SNFI consists of a systematic network of permanent plots distributed on a grid of 1 km square cells and with a planned remeasurement interval of 10 years. Each permanent plot comprises four concentric sub-plots with radii of 5, 10, 15 and 25 m in which the

minimum dbh (diameter at breast height) recorded are 75, 125, 225 and 425 mm, respectively. More information regarding technical aspects of Spanish NFI can be accessed in Alberdi Asensio *et al.* (2010), MMA (1990) and Villanueva (2004).

In these SNFI plots, in addition to tree variables (namely diameter at breast height (dbh) and tree height ( $H$ )), when the tree species inventoried was cork oak, a so-called 'special parameter' was recorded indicating whether the tree had been debarked. If it had, then a record was taken of whether the stem and branches had been debarked or not as well as the debarking height (DH). In the plots from the 2SNFI, the cork thickness was measured in 1–6 trees per plot, thus allowing the volume of cork on those trees to be calculated (see equation (1) for further details). It was assumed that the rest of the cork oaks in the same plot had the same cork thickness, which was the arithmetic mean of the cork thickness of the inventoried trees. However, in the 3SNFI, unlike the 2SNFI, cork thickness was not measured and therefore it is not possible to directly estimate the volume of cork on those trees. In order to fulfil the objectives of the study, the dataset employed was composed of SNFI monitored plots that included at least one cork oak with diameter higher than 20 cm in the production phase (i.e. that had been debarked at least once in 2SNFI). In order to allow comparisons to be drawn between both SNFI, the same trees were analysed in the 2SNFI and 3SNFI, thus those trees that died between 2SNFI and 3SNFI were not considered in the study. In accordance with this criterion, the number of plots considered was 2109 with a total of 10 543 cork oaks. The dataset included plots with both pure and mixed cork oak stands. Finally, the complete dataset used in the present study (Table 1) comprises the main stand variables, namely stand basal area ( $G$ ,  $m^2 ha^{-1}$ ), mean quadratic diameter (dg, cm) and number of trees per hectare ( $N$ , stems  $ha^{-1}$ ), as well as the tree variables recorded: diameter at breast height (dbh, cm), tree height ( $H$ , m), debarking height (DH, m) and, in the case of trees from the 2SNFI, cork thickness (ct, mm).

### Cork weight estimation and trend followed

#### SNFI plot level

To estimate cork weight in the plots belonging to the 2SNFI or the 3SNFI, two different approaches were applied depending on the data available. Although there is an extensive work on individual cork production models (see Vázquez-Piqué and Pereira, 2008 for references), the variables recorded in the 2SNFI in relation to cork production (debarking

**Table 1** Characterization of the main stand and tree-level variables of plots in the 2SNFI and 3SNFI according to their mean (Mean), minimum (Min), maximum (Maxi) values and standard deviation (Std. dev.)

| Variable               | 2SNFI |       |         |        |           | 3SNFI |      |        |        |           |
|------------------------|-------|-------|---------|--------|-----------|-------|------|--------|--------|-----------|
|                        | #     | Min   | Maxi    | Mean   | Std. dev. | #     | Min  | Maxi   | Mean   | Std. dev. |
| $G$ ( $m^2 ha^{-1}$ )  | 2109  | 0.42  | 53.12   | 11.17  | 8.01      | 2109  | 0.51 | 62.07  | 13.73  | 9.25      |
| dg (cm)                | 2109  | 7.95  | 146.50  | 32.66  | 17.09     | 2109  | 8.87 | 147.40 | 34.11  | 17.14     |
| $N$ (stems $ha^{-1}$ ) | 2109  | 5.09  | 2974.43 | 342.57 | 418.87    | 2109  | 5.09 | 3263   | 405.35 | 474.37    |
| $G_{rel}$ (%)          | 2109  | 0.37  | 100     | 61.40  | 37.12     | 2109  | 1.38 | 100    | 65.45  | 32.62     |
| $N_{rel}$ (%)          | 2109  | 1.36  | 100     | 67.31  | 33.17     | 2109  | 0.33 | 100    | 58.06  | 37.05     |
| dbh (cm)               | 2109  | 13.00 | 127.30  | 37.96  | 14.67     | 2109  | 9.10 | 135.6  | 41.38  | 16.12     |
| $H$ (m)                | 2109  | 4.00  | 25.00   | 8.46   | 2.34      | 2109  | 0    | 25.00  | 8.78   | 2.65      |
| DH (m)                 | 2109  | 0     | 10.00   | 2.35   | 1.70      | 2109  | 0    | 10.00  | 2.34   | 1.68      |
| ct (mm)                | 2109  | 11.00 | 70.00   | 24.92  | 11.49     | –     | –    | –      | –      | –         |

Here # is the number of plots,  $G$  is the basal area of the plot, dg is the quadratic mean diameter,  $N$  is the stand density,  $G_{rel}$  is the relative basal area of the cork oaks in the plot (%),  $N_{rel}$  is the relative stand density of the cork oaks in the plot (%), dbh is the diameter at breast height,  $H$  is the height of the tree, DH is the debarking height and ct is the cork thickness.

height (DH) and cork thickness (ct) were not compatible with any of these models. It was assumed that the shape of the trunk was cylindrical based on the work of [Montero \(1987\)](#) that introduced the concept of shape coefficient. The shape coefficient ([Montero, 1987](#)) is the relationship between the real debarking surface and the debarking surface if the stem was cylindrical, this coefficient being equal to 1 when debarking height is equal to 2.6 m and branches were not debarked. In our case the average debarking height in the trees considered were 2.39 and 2.41, for 2SNFI and 3SNFI respectively (Table 1). Based on this it was considered that the assumption of equalling the stem to a cylinder was justified. Therefore, the volume of cork of an individual tree was estimated using the following equation:

$$V_{\text{cork}} = \text{DH} \cdot \text{ct} \cdot \text{pbh} \quad (1)$$

where DH is the debarking height (m), ct is the cork thickness (m) and pbh is the stem circumference at breast height under bark (m). By multiplying the volume of cork ( $V_{\text{cork}}$  ( $\text{m}^3$ )) by the cork density ( $\text{kg m}^{-3}$ ), the cork weight for every tree is obtained. Cork density present a high variability not only among trees but also within the same tree because it depends on cork cell features as cell size and cell wall corrugation, the proportion of early-cork and late-cork in the annual ring, the extent of porosity and inclusions and discontinuities ([Pereira, 2011](#)). In the study a mean value of cork density accepted in the literature of  $251 \text{ kg m}^{-3}$  was used to calculate cork weight ([Pereira, 2011](#)). The sum of the cork weight of all the trees in the plot gives the cork weight per plot.

In the case of the 3SNFI, the cork thickness was not recorded and only the debarking height was available. To estimate the cork thickness in the trees from the 3SNFI, data from the 2SNFI were used as the starting point for the calculations: diameter under cork and the cork thickness of all the cork trees. With this information, the annual diameter increment of these trees was estimated by means of the model developed by [Sánchez-González et al. \(2006\)](#):

$$\widehat{id}_u = 0.18 + 7.89 \frac{1}{N} - 1.02 \frac{1}{\text{SI}} + 2.45 \frac{1}{du} \quad (2)$$

where  $\widehat{id}_u$  is the estimated annual diameter increment under cork (cm),  $N$  is the number of trees per hectare ( $\text{trees ha}^{-1}$ ), SI is the site index (m)

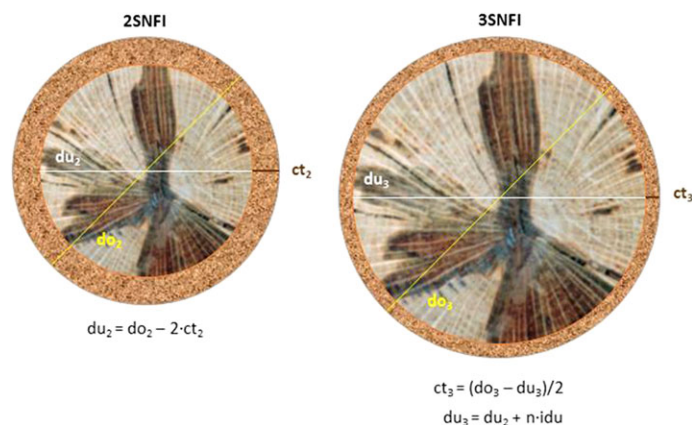

**Figure 1** Explanatory diagram to clarify the estimation of the diameter under cork  $du_i$  in each SNFI.  $ct_2$  is the measured cork thickness for trees on which this measurement was taken in the 2SNFI, while for the rest of the trees in the same plot this figure is taken as the arithmetic mean of the cork thickness of the inventoried trees.  $do_i$  is the diameter over cork, which is the only variable that was measured on all trees at both SNFI.  $N$  is the number of years between the 2SNFI and the 3SNFI.  $idu$  is the annual diameter increment which is estimated using the model developed by [Sánchez-González et al. \(2006\)](#).

and  $du$  is the diameter at breast height under cork at the 2SNFI, which is obtained by subtracting twice the arithmetic mean of the cork thickness of the inventoried trees from the measured diameter over cork of each tree. Since this model is recommended for use in cork stands that have a  $du$  higher than 20 cm, it was only used on trees of that size. All the variables included in the model are directly provided by the plots of the SNFI except the SI, which must be computed for each plot using the model for height growth of the dominant trees ([Sánchez-González et al., 2005](#)):

$$H = \frac{20.7216}{1 - \left(1 - \frac{20.7216}{\text{SI}}\right) \cdot \left(\frac{80}{T}\right)^{1.4486}} \quad (3)$$

where  $H$  is dominant height (m) and  $T$  is stand age (years) and SI is the site index (m).

Once the SI has been estimated for each plot, the annual diameter increment under cork of each cork oak tree from the plots of the 2SNFI is calculated. From this increment, the theoretical diameter under cork at the 3SNFI is estimated according to the following expression:

$$\widehat{du}_{3\text{SNFI}} = du_{2\text{SNFI}} + n \cdot id_u \quad (4)$$

where  $\widehat{du}_{3\text{SNFI}}$  is the estimated diameter at breast height under cork in the 3SNFI,  $du_{2\text{SNFI}}$  is the real diameter at breast height under cork in the 2SNFI,  $n$  is the number of years between the 2SNFI and the 3SNFI and  $id_u$  is the annual diameter increment under cork (cm) of the 2SNFI.

The difference between the estimated  $du_{3\text{SNFI}}$  and the diameter over cork provided by the plots of the 3SNFI is the cork thickness (ct) for the trees in the 3SNFI plots. Figure 1 shows an explanatory diagram to clarify the estimation of the diameter under cork in each SNFI. From the estimated cork thickness and the DH reported in the 3SNFI plots, the cork weight per plot can be estimated according to equation (1).

#### National level

Based on the calculations described above, cork weight was estimated for all productive cork oaks in both the 2SNFI and the 3SNFI. In order to estimate what these values represent at national level, the plot-level estimates of cork weight must be scaled up to landscape level. The categorical units chosen for this purpose were the forest types (FT), taken from the Spanish Forest Map (SFM, scale 1:50.000) ([MAAMA, 1997–2006](#); [Vallejo, 2005](#)). The SFM is the cartographic ‘pillar’ of the SNFI (in this case from the 3SNFI) and is produced through the photointerpretation of orthophotos together with fieldwork (at least 10 per cent of the polygons are visited) so that a classification of the territory into homogenous polygons is obtained. In the SFM, 73 FT are categorized according to the dominant species, canopy cover, management and development stage ([IEPNB, 2011](#)). The selected dataset plots from the 3SNFI were classified according to the SFM FTs. Taking into account the sampling design of the 3SNFI and the relative number of plots of each FT in the dataset, the forest area containing cork oaks in the production phase was estimated. As regards the 2SNFI2, the same study area was considered as ‘forest land remaining forest land’ ([Penman et al., 2003](#)) in the 3SNFI to avoid errors caused by methodological differences in the accuracy of the cartography used in each NFI cycle. Additionally, it was assumed that each plot maintained the same FT in both inventories.

#### Characterization of the productive cork stands according to different FT

In addition to estimating the cork weight per FT at national level and identifying the trend between the 2SNFI and the 3SNFI, it is also important to define the main characteristics of the cork producing stands in Spain. This objective is assessed by using the FTs from the SFM. Among the variables that serve to characterize these FT are all the variables related to the production of cork (ct, DH), relevant tree level variables

(dbh,  $H$ ) and stand level variables that describe the stand structure and its specific composition, for instance stand density ( $N$ ), basal area ( $G$ ) as well as their relative values expressed as a percentage of the total  $N$  ( $N_{rel}$ ) and  $G$  ( $G_{rel}$ ), respectively. The values adopted by these variables serve as reference values to characterize those stands capable of producing cork. The FT where cork oaks were found, together with the area occupied by each, is presented in Figure 2 and Table 2, respectively. González-Adrados (2015) found values of 689 000 has for pure *Quercus suber* stands and mixed stands of *Q. suber* and *Quercus ilex*. This result is in line with our estimation based on the SFM that only considered areas with cork oaks in the production phase instead of any cork oak.

## Results and discussion

### Cork weight estimation and trends

#### SNFI plot level

The results (Table 3) show that  $ct$  is significantly smaller in the 3SNFI, meaning that the cork weight is much lower in the

3SNFI than in the 2SNFI (Table 3). When the variables related to cork thickness estimation at plot level are disaggregated into diameter classes, it can be seen that cork thickness in the 3SNFI is greater for diameter classes above 120 (Figure 3). Negative values of cork thickness were found in the smaller diameter classes, mainly due to different sources of error that affect the estimation of diameter under cork ( $du_{3SNFI}$ ). Firstly, measurement errors derived from the uneven morphology of the cork. Secondly, errors derived from the assumption that the rest of the cork oaks in the same plot at the 2SNFI had the same cork thickness, which was the arithmetic mean of the cork thickness of the inventoried trees. This assumption led to incorrect estimation of the initial diameter under cork used to estimate the annual diameter increment. This source of error is especially relevant: (i) in those plots with cork oaks belonging to different diameter classes; (ii) in those plots that include both cork oaks that have never been debarked and cork oaks that have already been debarked, and (iii) in those trees of which cork age is very different in both inventories; for

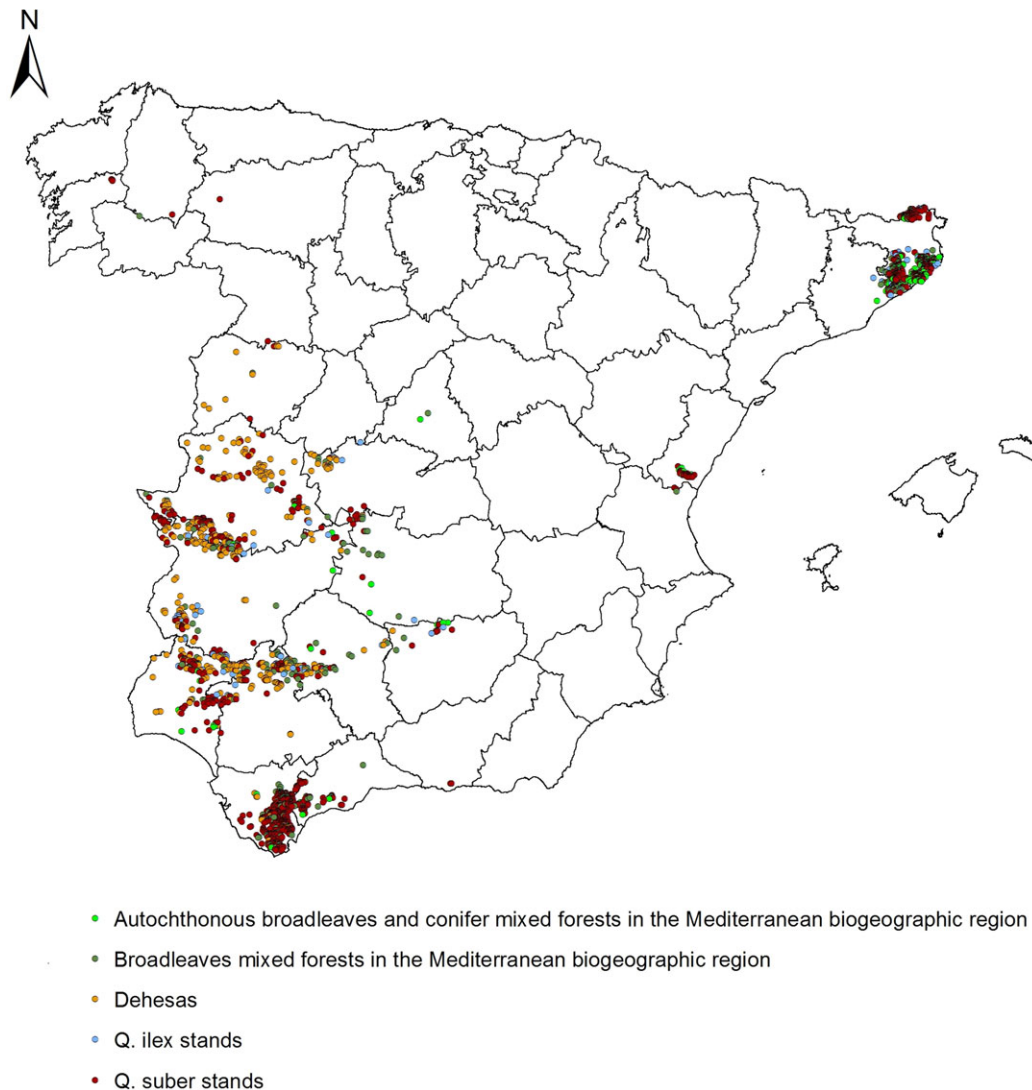

**Figure 2** Distribution of the SNFI plots characterized by the FT they belong to.



**Table 2** Description of the main forest types (FT) producing cork and the area covered by each type according 3SNFI

| Forest types                                                                                  | Description                                                                                                                                                                                                                                                                                                                                 | Area (ha)  |
|-----------------------------------------------------------------------------------------------|---------------------------------------------------------------------------------------------------------------------------------------------------------------------------------------------------------------------------------------------------------------------------------------------------------------------------------------------|------------|
| <i>Q. suber</i> stands                                                                        | Forests dominated by <i>Q. suber</i> (representing at least 70% of the canopy cover)                                                                                                                                                                                                                                                        | 208 741.34 |
| Dehesas                                                                                       | Forest with generally incomplete fraction of canopy cover and well-developed herbaceous layer, whose main product is the extensive use not only livestock with arable pasture, but also the woody plant fruits. Agro-forestry-pastoral system in which the management of extensive livestock is used as a conservation and improvement tool | 239 732.00 |
| Broadleaves mixed forests in the Mediterranean biogeographic region                           | Mixed forests composed by broadleaves located in the Mediterranean biogeographical region                                                                                                                                                                                                                                                   | 114 300.11 |
| Autochthonous broadleaves and conifer mixed forests in the Mediterranean biogeographic region | Mixed forests composed by autochthonous broadleaves and conifers located in the Mediterranean biogeographical region                                                                                                                                                                                                                        | 40 181.32  |
| <i>Q. ilex</i> stands                                                                         | Forests dominated by <i>Q. ilex</i> (representing at least 70% of the canopy cover)                                                                                                                                                                                                                                                         | 50 936.39  |
| Other FT                                                                                      |                                                                                                                                                                                                                                                                                                                                             | 59 373.99  |
| Total                                                                                         |                                                                                                                                                                                                                                                                                                                                             | 713 265.15 |

**Table 3** Characterization of the main variables related to cork production in the 2SNFI and 3SNFI according to their mean (Mean), minimum (Min), maximum (Max) values and standard deviation (Std. dev.)

| Variables                                | 2SNFI |       |         |        |           | 3SNFI |         |         |        |           |
|------------------------------------------|-------|-------|---------|--------|-----------|-------|---------|---------|--------|-----------|
|                                          | #     | Min   | Max     | Mean   | Std. dev. | #     | Min     | Max     | Mean   | Std. dev. |
| dbh (cm)                                 | 1728  | 20.00 | 127.30  | 39.36  | 13.71     | 1728  | 20.65   | 135.60  | 43.54  | 15.11     |
| <i>H</i> (m)                             | 1728  | 3.50  | 17.30   | 8.70   | 2.19      | 1728  | 4.00    | 17.00   | 9.26   | 2.15      |
| DH (m)                                   | 1728  | 0.10  | 9.90    | 2.54   | 1.69      | 1728  | 0.50    | 9.90    | 2.50   | 1.68      |
| ct (mm)                                  | 1728  | 1.00  | 67.50   | 24.63  | 11.82     | 1728  | -90.20  | 87.17   | 9.14   | 11.66     |
| $w_{\text{cork}}$ (kg ha <sup>-1</sup> ) | 1728  | 4.00  | 8790.61 | 807.80 | 892.11    | 1728  | -695.63 | 7630.49 | 349.52 | 586.23    |

Here # is the number of plots, dbh is the diameter at breast height, *H* is the height of the tree, DH is the debarking height, ct is the cork thickness and  $w_{\text{cork}}$  is the cork weight. All the variables have been measured except ct in 3SNFI plots and  $w_{\text{cork}}$  in 2SNFI and 3SNFI which have been estimated based on the measured variables.

example, those trees that were about to be debarked in the 2SNFI but were already debarked in the 3SNFI. Thirdly, the error associated with applying the diameter increment model equation (2) to estimate the du in the 3SNFI. This model is recommended for use in cork stands with trees that have a du between 20 and 80 cm and have been debarked at least three times, in other words, in stands that only produce mature cork (also termed ‘reproduction cork’), which is that obtained from the third debarking onwards. That is the reason why it was decided to remove cork oak trees smaller than 20 cm of du from the analysis. However, it was also decided not to remove trees bigger than 80 cm because the error committed in those trees when estimating the annual diameter increment is negligible due to the low growth rate in older trees. In addition, those models were developed using data from the two main areas in Spain with dense cork oak forests, Catalonia and Los Alcornocales Natural Park. The suitability of this model to dehesas has not been tested and it is possible that in those stands the performance would be inferior (Sánchez-González et al., 2006). Although negative values of cork thickness are meaningless as far as cork estimation

purpose is concerned, it was decided to show these results to illustrate that cork weight cannot be estimated without an accurate measurement of cork thickness.

Notable differences between the 2SNFI and the 3SNFI are still evident even where the variables are classified according to different site indices (SI) (Table 4). In this regard, the results indicate that there is no direct relationship between site index (SI) and cork-production related variables, confirming the results found in the literature (Almeida et al., 2010). Although the plots with the highest mean cork weight values are those belonging to SI 14 m, the amount of cork produced by stands with SI 6 m is almost the same, closely followed by stands with SI 12 m, 10 m and 8 m, respectively. The same pattern is found in the case of ct, with all the SI presenting very similar values of mean ct, which indicates that SI and ct are not directly related either. Furthermore, ct is a good indicator of the cork production quality of a stand (Paulo et al., 2017), hence, a national level cork quality map could be produced if the age of the cork were recorded when performing the stand inventory. This type of characterization is not currently possible with the available data.

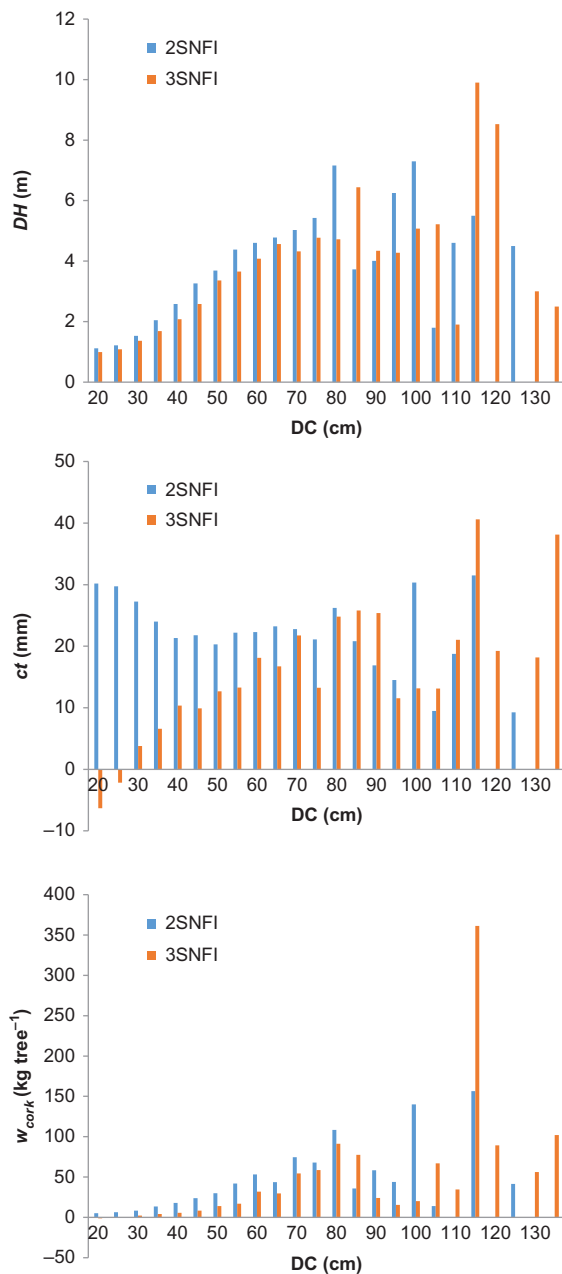

**Figure 3** Mean values per diameter class over cork (DC) of the main cork-production related variables: debarking height (DH), cork thickness (ct) and the cork weight ( $w_{cork}$ ).

#### National level

Apart from the mean values presented in the previous sections, it is highly important to have accurate estimations of the cork weight produced at national level in Spain. Cork oaks in the production phase belong to different FTs, in which cork production may or may not be the main management objective. In the case of *cork oak stands* and *dehesas* (agro-silvopastoral systems), cork oak is the dominant species, as can be observed from the *Grel* and *Nrel* values presented by these stands (Table 5), hence their

management is oriented towards cork production. However, there are other FTs in which cork oak is not the main species, such as 'Broadleaf mixed forests in the Mediterranean biogeographic region', 'Autochthonous broadleaf and conifer mixed forests in the Mediterranean biogeographic region' and '*Quercus ilex stands*'. The mean cork weight estimations at FT level are presented in Table 5. According to these results, a clear pattern can be identified; all the FT present higher values for cork weight in the 2SNFI than in the 3SNFI. For instance, in *Quercus suber stands* (the main cork producing FT), cork weight in the 3SNFI drops to 55 per cent of that obtained in the 2SNFI. A similar decline (62 per cent) is found for the Broadleaf mixed forests in the Mediterranean biogeographic region FT. Still more notable are the cases *Autochthonous broadleaf and conifer mixed forests in the Mediterranean biogeographic region* FT in which the reduction is 72 per cent while in *dehesas* and *Quercus ilex stands* cork weight only falls by 38 and 46 per cent, respectively, between the 2SNFI and the 3SNFI.

Table 6 presents total cork weight at national level. The results shown for the 3SNFI represent the total cork weight for Spain while the figures for the 2SNFI refer to the cork weight of forest which was still forest (Penman et al. 2003) in the 3SNFI. In other words, it is possible that other areas with productive cork oaks in the 2SNFI were not taken into account because they had disappeared by the 3SNFI (forest fires, diseases). As stated in the Introduction, the cork weight estimated is referred to standing cork weight and cannot be directly compared with the official statistics of cork production (MAGRAMA, 2015, see Appendix A for a summary of this data) that provide information on the amount of cork commercialized. The decrease in standing cork weight between the 2SNFI and 3SNFI can only be related to the uncertainty in ct estimation (described in section 3.1.1.) since official statistics do not report an increased in the cork commercialized (MAGRAMA, 2015; Appendix A) on the contrary the trend is decreasing, and the results (Table 5) showed an increase in the amount of trees and in their dimensions.

It is important to highlight the fact that cork oak is only the main species in one of the FT analysed (*Q. suber stands*), although it is also dominant in many *dehesa* plots. In the rest of the FTs considered, cork oak is a companion species. These latter FTs account for 37 per cent of the total area in which productive cork oaks occur, hence the importance of these FTs, where management not only focuses on cork production.

#### Characterization of cork producing FTs

Along with the reference values for cork weight, another valuable piece of information provided in the present study is the dendrometric characterization (Table 5), particularly the description of *Q. suber* and *dehesa stands*. These FTs share common features in terms of species composition but differ with regard to stand structure. The results (Table 5) show that *Q. suber stands* have a higher number of *Q. suber* stems per hectare and a lower mean *dbh* than in *dehesa* stands, as expected. When the minimum *dbh* considered is 10 cm the mean value for the basal area in *Q. suber stands* was 13.44 and 16.30 m<sup>2</sup> ha<sup>-1</sup> in the 2SNFI and 3SNFI, respectively, while in *dehesas* it was significantly lower at 8.14 and 9.05 m<sup>2</sup> ha<sup>-1</sup> in the 2SNFI and 3SNFI, respectively. Regarding the stand density, the mean values

**Table 4** Characterization of the main variables related to cork production in the 2SNFI and 3SNFI according to their mean (Mean), minimum (Min), maximum (Maxi) values and standard deviation (Std. dev.) according to different site indices (SI)

| SI | Variable                                 | 2SNFI |         |         |        |                | 3SNFI |         |         |        |                |
|----|------------------------------------------|-------|---------|---------|--------|----------------|-------|---------|---------|--------|----------------|
|    |                                          | #     | Minimum | Maximum | Mean   | Std. deviation | #     | Minimum | Maximum | Mean   | Std. deviation |
| 6  | dbh (mm)                                 | 787   | 200.00  | 1273.00 | 378.22 | 136.38         | 780   | 206.50  | 1356.00 | 415.62 | 148.66         |
|    | H (m)                                    | 787   | 3.50    | 17.30   | 8.53   | 2.16           | 773   | 4.00    | 16.20   | 8.45   | 1.90           |
|    | DH (m)                                   | 778   | 0.10    | 9.90    | 2.39   | 1.58           | 762   | 0.50    | 9.90    | 2.35   | 1.58           |
|    | ct (mm)                                  | 756   | 1.00    | 67.50   | 24.73  | 12.07          | 749   | -90.20  | 80.25   | 9.52   | 11.04          |
|    | $w_{\text{cork}}$ (kg ha <sup>-1</sup> ) | 787   | 11.78   | 5701.77 | 795.84 | 893.86         | 787   | -244.84 | 7630.49 | 362.71 | 637.21         |
| 8  | dbh (mm)                                 | 331   | 209.50  | 987.00  | 371.89 | 117.54         | 330   | 224.00  | 1066.00 | 413.86 | 129.75         |
|    | H (m)                                    | 331   | 4.50    | 14.00   | 8.18   | 1.89           | 328   | 5.30    | 13.64   | 8.62   | 1.68           |
|    | DH (m)                                   | 330   | 0.60    | 9.90    | 2.33   | 1.51           | 316   | 0.60    | 9.90    | 2.37   | 1.49           |
|    | ct (mm)                                  | 331   | 2.50    | 57.00   | 24.44  | 11.45          | 331   | -22.79  | 44.39   | 9.50   | 10.97          |
|    | $w_{\text{cork}}$ (kg ha <sup>-1</sup> ) | 331   | 17.57   | 5214.10 | 703.68 | 773.87         | 331   | -365.79 | 4067.20 | 309.47 | 480.96         |
| 10 | dbh (mm)                                 | 295   | 202.50  | 1241.00 | 387.60 | 134.18         | 292   | 207.50  | 1305.00 | 427.33 | 145.10         |
|    | H (m)                                    | 295   | 4.00    | 16.33   | 8.49   | 2.07           | 292   | 5.40    | 15.57   | 9.17   | 1.79           |
|    | DH (m)                                   | 290   | 0.70    | 9.90    | 2.48   | 1.65           | 286   | 0.70    | 9.90    | 2.42   | 1.56           |
|    | ct (mm)                                  | 287   | 1.00    | 54.13   | 25.00  | 11.49          | 284   | -65.54  | 43.50   | 6.92   | 11.03          |
|    | $w_{\text{cork}}$ (kg ha <sup>-1</sup> ) | 295   | 27.40   | 5136.55 | 825.36 | 841.20         | 295   | -430.58 | 2735.60 | 282.96 | 452.25         |
| 12 | dbh (mm)                                 | 273   | 224.50  | 1028.00 | 402.00 | 137.98         | 272   | 239.00  | 1098.00 | 448.72 | 153.17         |
|    | H (m)                                    | 273   | 4.42    | 15.00   | 8.77   | 2.10           | 270   | 5.88    | 15.50   | 9.79   | 1.86           |
|    | DH (m)                                   | 271   | 0.70    | 9.20    | 2.64   | 1.80           | 263   | 0.70    | 9.50    | 8.92   | 1.76           |
|    | ct (mm)                                  | 260   | 1.00    | 62.50   | 24.77  | 12.56          | 259   | -40.49  | 87.17   | 2.62   | 13.01          |
|    | $w_{\text{cork}}$ (kg ha <sup>-1</sup> ) | 273   | 4.00    | 8790.61 | 837.70 | 1015.66        | 273   | -461.01 | 3041.66 | 331.80 | 531.24         |
| 14 | dbh (mm)                                 | 380   | 216.00  | 987.00  | 446.16 | 144.14         | 376   | 236.00  | 1139.00 | 495.82 | 161.94         |
|    | H (m)                                    | 380   | 4.75    | 16.25   | 9.69   | 2.39           | 372   | 7.00    | 17.00   | 11.31  | 2.11           |
|    | DH (m)                                   | 374   | 0.50    | 9.90    | 3.01   | 1.94           | 360   | 0.50    | 9.90    | 2.94   | 1.98           |
|    | ct (mm)                                  | 370   | 1.00    | 57.50   | 24.15  | 11.36          | 366   | -29.20  | 60.36   | 9.98   | 12.84          |
|    | $w_{\text{cork}}$ (kg ha <sup>-1</sup> ) | 380   | 6.54    | 5891.80 | 895.38 | 929.34         | 380   | -695.63 | 6300.78 | 425.96 | 681.84         |

Here # is number of plots, dbh is the diameter at breast height, H is the height of the tree, DH is the debarking height, ct is the cork thickness and  $w_{\text{cork}}$  is the cork weight. All the variables have been measured except ct in 3SNFI plots and  $w_{\text{cork}}$  in 2SNFI and 3SNFI which have been estimated based on the measured variables.

obtained for *Q. suber* stands varied from 285 trees ha<sup>-1</sup> in the 2SNFI to 385 in the 3SNFI, and from 81 to 82 trees ha<sup>-1</sup> in *dehesas*. In the case of *dehesas* the references values remained almost constant from the 2SNFI to the 3SNFI while in *Q. suber* forests the stocking values obtained in the 3SNFI were higher than those of the 2SNFI. These values point to a lack of natural regeneration and subsequent lack of recruitment to the minimum diameter class measured in *dehesas* (Sánchez-González et al., 2015), in contrast to the dynamic structure of *Q. suber* stands. In this regard, mention should be given to the *Q. suber* stands established in the 1990s thanks to support from the Common Agricultural Policy of the European Union. One reason for the increase in the stocking values observed could be the recruitment of younger oak trees in these stands to the juvenile stage, reaching the minimum dbh recorded in the SNFI.

## Final remarks

National Forest Inventories (NFI) play an important role in providing information on the multiple functions of forests and the

goods and services they provide (Fridman et al., 2014). The suitability of NFIs for a variety different objectives and requirements is now widely accepted (i.e. forest carbon pools and carbon sequestration estimation, assessment of forest health or biodiversity indices), with inventories becoming multi-objective (Corona et al., 2011). Today, NFIs face new challenges, such as the assessment of NWFP production. Given the important role played by these products not only in rural communities but also in national economies (Masiero et al., 2016) there is a need for accurate quantification of this production. In this regard, the aim of the present study is to provide a starting point for this avenue of research, focusing on cork production in Spain as a case study. The multi-objective capacity of NFIs has been explored by broadening the monitored variables, thus increasing their efficiency. Due to the high number of plots and variables recorded in all the national forest types, NFIs provide the best large-scale monitoring system for data related to cork oaks.

With regard to the first objective of the study, which is the correct assessment of the cork weight produced by a cork oak, it is necessary to record two variables: ct and DH. These

**Table 5** Statistics relating to cork weight production and the main stand variables selected for the Forest type (FT) analysed according to their mean (Mean), minimum (Min), maximum (Max) values and standard deviation (Std. dev.)

| FT                                                                                            | Variable                                    | 2SNFI |        |         |         |           | 3SNFI   |         |        |           |
|-----------------------------------------------------------------------------------------------|---------------------------------------------|-------|--------|---------|---------|-----------|---------|---------|--------|-----------|
|                                                                                               |                                             | #     | Min    | Max     | Mean    | Std. dev. | Min     | Max     | Mean   | Std. dev. |
| <i>Q. suber</i> stands                                                                        | dbh (mm)                                    | 880   | 211.00 | 1146.00 | 378.14  | 112.14    | 210.50  | 1187.00 | 418.40 | 122.99    |
|                                                                                               | <i>H</i> (m)                                | 880   | 3.50   | 16.00   | 8.74    | 2.26      | 4.00    | 16.20   | 9.29   | 2.14      |
|                                                                                               | DH (m)                                      | 880   | 0.50   | 9.90    | 2.45    | 1.55      | 0.50    | 9.90    | 2.42   | 1.52      |
|                                                                                               | ct (mm)                                     | 880   | 1.00   | 54.13   | 23.40   | 10.55     | -65.54  | 50.12   | 8.79   | 10.55     |
|                                                                                               | $w_{\text{cork}}$ (kg ha <sup>-1</sup> )    | 880   | 4.00   | 8790.61 | 1056.99 | 1063.79   | -430.58 | 7630.49 | 480.25 | 745.35    |
|                                                                                               | <i>N</i> (trees ha <sup>-1</sup> )          | 880   | 5      | 2189    | 216     | 238       | 5       | 2310    | 224    | 244       |
|                                                                                               | <i>G</i> (m <sup>2</sup> ha <sup>-1</sup> ) | 880   | 0.85   | 40.83   | 12.45   | 6.88      | 1.06    | 51.24   | 14.42  | 7.90      |
|                                                                                               | <i>N</i> <sub>rel</sub> (%)                 | 880   | 1.13   | 100.00  | 87.04   | 22.80     | 1.96    | 100.00  | 83.34  | 25.46     |
|                                                                                               | <i>G</i> <sub>rel</sub> (%)                 | 880   | 14.25  | 100.00  | 91.71   | 14.53     | 6.79    | 100.00  | 90.21  | 14.87     |
| Dehesas                                                                                       | dbh (mm)                                    | 340   | 209.50 | 1106.50 | 485.06  | 143.39    | 255.00  | 1201.50 | 540.50 | 154.89    |
|                                                                                               | <i>H</i> (m)                                | 340   | 5.00   | 14.79   | 8.50    | 1.77      | 4.50    | 14.65   | 9.07   | 1.77      |
|                                                                                               | DH (m)                                      | 338   | 0.60   | 9.90    | 3.67    | 1.84      | 0.90    | 9.90    | 3.69   | 1.89      |
|                                                                                               | ct (mm)                                     | 340   | 1.00   | 51.50   | 18.45   | 9.17      | -34.93  | 87.17   | 13.00  | 10.94     |
|                                                                                               | $w_{\text{cork}}$ (kg ha <sup>-1</sup> )    | 340   | 10.39  | 4388.34 | 733.76  | 783.70    | -111.25 | 4185.97 | 455.42 | 607.76    |
|                                                                                               | <i>N</i> (trees ha <sup>-1</sup> )          | 340   | 5      | 343     | 47      | 47        | 5       | 302     | 46     | 45        |
|                                                                                               | <i>G</i> (m <sup>2</sup> ha <sup>-1</sup> ) | 340   | 0.67   | 21.29   | 6.19    | 4.16      | 0.74    | 22.46   | 6.94   | 4.53      |
|                                                                                               | <i>N</i> <sub>rel</sub> (%)                 | 340   | 1.83   | 100.00  | 64.25   | 35.38     | 1.17    | 100.00  | 63.71  | 35.70     |
|                                                                                               | <i>G</i> <sub>rel</sub> (%)                 | 340   | 5.87   | 100.00  | 72.47   | 29.08     | 6.50    | 100.00  | 72.46  | 28.98     |
| Broadleaves mixed forests in the Mediterranean biogeographic region                           | dbh (mm)                                    | 261   | 201.00 | 779.33  | 397.20  | 128.39    | 207.00  | 825.00  | 437.49 | 141.18    |
|                                                                                               | <i>H</i> (m)                                | 261   | 4.00   | 16.00   | 8.95    | 2.27      | 4.50    | 17.00   | 9.59   | 2.33      |
|                                                                                               | DH (m)                                      | 259   | 0.80   | 8.84    | 2.42    | 1.56      | 0.80    | 8.40    | 2.32   | 1.39      |
|                                                                                               | ct (mm)                                     | 261   | 1.00   | 54.50   | 24.72   | 11.64     | -24.66  | 80.25   | 9.68   | 12.70     |
|                                                                                               | $w_{\text{cork}}$ (kg ha <sup>-1</sup> )    | 261   | 6.54   | 4947.89 | 607.81  | 711.77    | -144.81 | 1595.02 | 229.29 | 323.00    |
|                                                                                               | <i>N</i> (trees ha <sup>-1</sup> )          | 261   | 5      | 787     | 113     | 139       | 5       | 774     | 122    | 152       |
|                                                                                               | <i>G</i> (m <sup>2</sup> ha <sup>-1</sup> ) | 261   | 0.63   | 28.50   | 6.44    | 4.43      | 0.67    | 21.85   | 7.26   | 4.55      |
|                                                                                               | <i>N</i> <sub>rel</sub> (%)                 | 261   | 1.47   | 100.00  | 40.14   | 29.56     | 1.37    | 100.00  | 35.62  | 26.92     |
|                                                                                               | <i>G</i> <sub>rel</sub> (%)                 | 261   | 11.52  | 100.00  | 58.47   | 23.66     | 10.07   | 100.00  | 54.73  | 21.54     |
| Autochthonous broadleaves and conifer mixed forests in the Mediterranean biogeographic region | dbh (mm)                                    | 123   | 200.00 | 591.50  | 317.11  | 90.25     | 243.00  | 595.73  | 348.77 | 98.28     |
|                                                                                               | <i>H</i> (m)                                | 123   | 4.50   | 12.70   | 8.17    | 1.81      | 5.30    | 14.12   | 9.00   | 1.93      |
|                                                                                               | DH (m)                                      | 122   | 0.76   | 6.40    | 1.80    | 1.00      | 0.78    | 4.90    | 1.71   | 0.88      |
|                                                                                               | ct (mm)                                     | 123   | 6.50   | 51.00   | 27.88   | 10.99     | -28.16  | 43.13   | 5.45   | 13.21     |
|                                                                                               | $w_{\text{cork}}$ (kg ha <sup>-1</sup> )    | 123   | 38.54  | 2490.59 | 582.14  | 556.98    | -463.95 | 2340.00 | 162.43 | 404.17    |
|                                                                                               | <i>N</i> (trees ha <sup>-1</sup> )          | 123   | 5      | 831     | 232     | 200       | 5       | 934     | 250    | 212       |
|                                                                                               | <i>G</i> (m <sup>2</sup> ha <sup>-1</sup> ) | 123   | 0.62   | 36.58   | 8.19    | 6.16      | 0.88    | 38.14   | 9.46   | 6.77      |
|                                                                                               | <i>N</i> <sub>rel</sub> (%)                 | 123   | 2.04   | 100.00  | 44.98   | 25.79     | 9.47    | 100.00  | 31.80  | 22.05     |
|                                                                                               | <i>G</i> <sub>rel</sub> (%)                 | 123   | 5.05   | 100.00  | 50.52   | 23.08     | 9.42    | 100.00  | 49.14  | 20.60     |
| <i>Q. ilex</i> stands                                                                         | dbh (mm)                                    | 84    | 223.25 | 907.00  | 423.97  | 177.31    | 236.00  | 980.50  | 467.40 | 188.99    |
|                                                                                               | <i>H</i> (m)                                | 84    | 5.00   | 15.00   | 8.59    | 2.13      | 5.83    | 15.00   | 9.13   | 2.12      |
|                                                                                               | DH (m)                                      | 83    | 0.60   | 9.90    | 2.82    | 2.20      | 0.75    | 9.90    | 2.95   | 2.46      |
|                                                                                               | ct (mm)                                     | 84    | 3.00   | 57.00   | 23.09   | 14.32     | -24.52  | 47.06   | 10.60  | 13.36     |
|                                                                                               | $w_{\text{cork}}$ (kg ha <sup>-1</sup> )    | 84    | 25.43  | 2294.95 | 383.71  | 470.02    | -95.13  | 2150.27 | 206.13 | 378.89    |
|                                                                                               | <i>N</i> (trees ha <sup>-1</sup> )          | 84    | 5      | 216     | 39      | 54        | 5       | 161     | 38     | 45        |
|                                                                                               | <i>G</i> (m <sup>2</sup> ha <sup>-1</sup> ) | 84    | 0.66   | 11.72   | 3.08    | 2.44      | 0.89    | 14.12   | 3.44   | 2.54      |
|                                                                                               | <i>N</i> <sub>rel</sub> (%)                 | 84    | 0.79   | 70.24   | 17.86   | 17.12     | 0.51    | 74.29   | 17.47  | 18.06     |
|                                                                                               | <i>G</i> <sub>rel</sub> (%)                 | 84    | 7.42   | 67.71   | 32.00   | 17.15     | 6.31    | 91.73   | 43.94  | 17.99     |

Here # is number of plots, dbh is the diameter at breast height, *H* is the height of the tree, DH is the debarking height, ct is the cork thickness  $w_{\text{cork}}$  is the cork weight, *N* is the stand density, *G* is the basal area of the plot, *N*<sub>rel</sub> is the relative stand density of the cork oaks in the plot and *G*<sub>rel</sub> is the relative basal area of the cork oaks in the plot. All the variables have been measured except ct in 3SNFI plots and  $w_{\text{cork}}$  in 2SNFI and 3SNFI which have been estimated based on the measured variables.



**Table 6** Total cork weight at national level according to the 2SNFI and 3SNFI, based on the area estimated in the 3SNFI (Table 1).

| FT                                                                                            | 2SNFI                 | 3SNFI                 |
|-----------------------------------------------------------------------------------------------|-----------------------|-----------------------|
|                                                                                               | $W_{\text{cork}}$ (t) | $W_{\text{cork}}$ (t) |
| <i>Q. suber</i> stands                                                                        | 245 500.69            | 83 763.72             |
| Dehesas                                                                                       | 179 199.67            | 103 681.69            |
| Broadleaves mixed forests in the Mediterranean biogeographic region                           | 77 249.73             | 24 087.61             |
| Autochthonous broadleaves and conifer mixed forests in the Mediterranean biogeographic region | 26 294.25             | 4301.81               |
| <i>Q. ilex</i> stands                                                                         | 17 047.90             | 8001.60               |
| Other FT                                                                                      | 18 652.89             | 8282.33               |
| Total                                                                                         | 563 945.13            | 232 118.76            |

variables were recorded in the 2SNFI allowing accurate estimations of the cork produced in Spain at national level to be obtained. In the case of the 3SNFI, the lack of field measurements of ct prevented the correct assessment of the cork weight, because cork data available in the 3SNFI are not suitable for estimating cork weight in a proper way. However, a common data source and methodological approach are needed to address the current lack of accuracy and robustness in cork production estimates at national level, so it is necessary some improvements when inventorying cork oak stands in the following SNFIs. With regard to the second objective, it is not possible to depict the trend followed by this NWFP at national level, although this information would be very useful for the forestry sector. In this respect, the figures suggest that cork production is decreasing (MAGRAMA, 2015) even though cork oak stocking is increasing at national level, with 28 million more mature trees in the 3SNFI compared with the 2SNFI and 7 million more in the case trees in the juvenile stage (Montero and Serrada, 2013). This apparently conflicting information reveals the importance of establishing a robust, complete data source at national level. Additional information is needed to determine whether the decrease in cork production is due to the decrease in productivity of cork oak stands, an increase in tree mortality or the abandonment of cork harvesting. An improvement to the NFI monitoring design with regard to cork data would address this issue. As regards the third objective, the SNFI and SFM allow us to depict the characteristics of the main cork producing FT in Spain, of which *Q. suber* stands and *dehesas* are of particular interest. It is common knowledge that *Q. suber* stands are more densely stocked and have thinner trees than *dehesas*, but this study provides reference values that would allow a more refined assessment of these stands.

Certain other aspects also deserve consideration, such as the way in which site index is defined. Site index expressed as the dominant height at a reference age is not the best indicator for defining cork growth. Other indices such as the cork index (cork thickness at a reference age) have been found to provide a better indication of cork quality in terms of growth. Nevertheless, it should be borne in mind that site index does influence cork weight through growth in tree diameter, therefore the growth of the tree should be considered when estimating cork weight. An alternative way to describe the growth of cork oaks in Spain would be to define a site index based on climatic and edaphic characteristics (Paulo et al., 2015).

In short, the results discussed above point to a need for improvement in the information content of SNFI and specifically, the requirement to define an innovative approach to inventorying cork oak stands in the 4SNFI and subsequent inventories. In order to estimate the production of cork in Spanish cork oaks using data from the following SNFI, it is necessary to provide not only debarking height but also cork thickness. Hence the main recommendation based on this study is that in future NFIs the cork thickness of all the cork oaks in a plot should be measured. In addition, it is very important to know the cork age when the inventory is carried out. In Spain, cork age could only be determined if a cork sample is taken, then, it is also recommended that a sample of cork should be taken from the inventoried trees. The sample would be sanded in the laboratory, thus facilitating the estimation of cork age and the annual cork growth. Once the cork age is determined (i.e. years since the last debarking), it would be possible not only to accurately estimate the cork weight in a sample of trees but also to assess visually the cork quality in terms of cork thickness, cork porosity and the presence of anomalies, and in turn to classify cork production according to the suitability of the cork for the production of one-piece cork stoppers. This recommendation has been accepted by the Head of the SNFI. Hence, with the data obtained, it will in future be possible to define a cork productivity map at national level. Data on annual cork growth will allow us to relate cork growth to climatic variables through dendrometric analysis. From the sample of cork, along with data regarding cork density, cork porosity and presence of anomalies will be determined, providing a complete description of the cork quality of each tree. By adopting the abovementioned recommendations, the SNFI will provide valuable information to policy makers, cork sector professionals and forest owners with regard to accurately quantifying and characterizing the production of cork in Spain at regional and national level. In addition, this information will allow for better characterization of the cork value chain by providing information which can be used to develop indicators relative to cork oak area in terms of productivity, potentiality and usability, as well as the value and quantity of cork production.

## Acknowledgements

The authors wish to thank all the staff that made possible the development of the NFI and especially Roberto Vallejo, Head of the Spanish

National Forest Inventory, for kindly providing access to the full Spanish NFI datasets. The authors also thank Dr Adam Collins for correcting the English and two anonymous reviewers who suggested improvements in the manuscript.

## Funding

The present investigation was financially supported by the projects 'STARTREE: Multipurpose trees and non-wood forest products a challenge and opportunity' (FP7-KBBE-2012-6) funded by the European Union's 7th Framework Programme for Research and Technological Development and demonstration under grant agreement No. 311919, 'DIABOLO: Distributed, Integrated and Harmonised Forest Information For Bioeconomy Outlooks' funded by the Horizon 2020 The EU Framework Programme for Research and Innovation programme under grant agreement No. 633464 and AEG-13-72 agreement of the Spanish Ministry of Agriculture, Food and Environment (MAGRAMA) and the Spanish National Institute for Agricultural and Food Research and Technology (INIA) of the Spanish Ministry of Science and Innovation (MICINN).

## Conflict of interest statement

None declared.

## References

- Alberdi Asensio, I., Condés Ruiz, S., Millán, J.M., Saura Martínez De Toda, S., Sánchez Peña, G., Pérez Martín, F., et al. 2010 National Forest Inventories Report, Spain. In *National Forest Inventories. Pathways for Common Reporting*. Tomppo E., Gschwantner T., Lawrence M. and McRoberts R.E. (eds). Springer, pp. 529–540.
- Alberdi, I., Vallejo, R., Álvarez-González, J.G., Condés, S., González-Ferreiro, E., Guerrero, S., et al. 2017 The multi-objective Spanish National Forest Inventory. *Forest Syst.* **26** (2), e04. DOI: <http://dx.doi.org/10.5424/fs/2017262-10577>.
- Almeida, A.M., Tomé, J. and Tomé, M. 2010 Development of a system to predict the evolution of individual tree mature cork caliber over time. *For. Ecol. Manage.* **260** (8), 1303–1314.
- Corona, P., Chirici, G., McRoberts, R.E., Winter, S. and Barbat, A. 2011 Contribution of large-scale forest inventories to biodiversity assessment and monitoring. *For. Ecol. Manage.* **262** (11), 2061–2069.
- FOREST EUROPE, UNECE and FAO 2011. *State of Europe's Forests 2011*. Europe's Status & Trends in Sustainable Forest Management in Europe. Project coordinator: Roman Michalack. Forest Europe Liaison Unit Oslo, United Nations Economic Commission for Europe, Food and Agriculture Organization of the United Nations.
- Fridman, J., Holm, S., Nilsson, M., Nilsson, P., Ringvall, A.H. and Ståhl, G. 2014 Adapting National Forest Inventories to changing requirements – the case of the Swedish National Forest Inventory at the turn of the 20th century. *Silva Fenn* **48** (3), 1–29. article-id 1095.
- González Adrados, J.R. 2015 Les actes du Med Suber 1: 1ère Rencontre Méditerranéenne ChercheursGestionnaires-Industriels sur la Gestion des Suberaies et la Qualité du liège. Les 19 et 20 octobre 2009 – Université de Tlemcen, pp. 78–81.
- IEPNB 2011 Informe del Inventario Español del Patrimonio Natural y de la Biodiversidad. Análisis de la situación. Año 2009. Ministerio de Medio Ambiente, y Medio Rural y Marino. Organismo Autónomo Parques Nacionales.
- Ludvig, A., Tahvanainen, V., Dickson, A., Evard, C., Kurttila, M., Cosovic, M., et al. 2016 The practice of entrepreneurship in the non-wood forest products sector: Support for innovation on private forest land. *Forest Policy Econ.* **66**, 31–37.
- MAAMA 1997–2006 *Mapa Forestal De España: a Escala 1:50.000*. Ministerio De Agricultura, Alimentación y Medio Ambiente. Serie publicación digital.
- MAGRAMA. 2015. *Anuario de Estadística Forestal. Avance para 2012*. [http://www.magrama.gob.es/es/biodiversidad/estadisticas/forestal\\_anuarios\\_todos.aspx](http://www.magrama.gob.es/es/biodiversidad/estadisticas/forestal_anuarios_todos.aspx).
- Masiero, M., Pettenella, D. and Secco, L. 2016 From failure to value: economic valuation for a selected set of products and services from Mediterranean forests. *Forest Syst.* **25** (1), e051.
- Miina, J., Pukkala, T., Hotanen, J.-P. and Salo, K. 2010 Optimizing the joint production of timber and bilberries. *For. Ecol. Manage.* **259**, 2065–2071.
- MMA 1990 *Segundo Inventario Forestal Nacional, 1986–1995. Explicaciones y métodos*. Organismo Autónomo Parques Nacionales, Ministerio de Agricultura, Pesca y Alimentación.
- Montero, G. 1987 Modelos para cuantificar la producción de corcho en alcornoques (*Quercus suber* L.), en función de la calidad de estación y de los tratamientos selvícolas. Universidad Politécnica de Madrid.
- Montero, G. and Serrada, R. 2013 *La situación de los bosques y el sector forestal en España – ISFE 2013*. Edit. Sociedad Española de Ciencias Forestales. Lourizán (Pontevedra).
- Nasi, R., Wunder, S. and Campos, J.J. 2002 *Forest ecosystem services: can they pay our way out of deforestation?* Prepared for GEF for the Forestry Roundtable, 11 March.
- Palahí, M., Pukkala, T., Bonet, J.A., Colinas, C., Fischer, C.R. and Martínez de Aragón, J. 2009 Effect of the inclusion of mushroom values on the optimal management of even-aged pine stands of Catalonia. *Forest Sci.* **55** (6), 503–511.
- Pasalodos-Tato, M., Pukkala, T., Calama, R., Cañellas, I. and Sánchez-González, M. 2016 Optimal management of *Pinus pinea* stands when cone and timber production are considered. *Eur. J. For. Res.* **135** (4), 607–619.
- Paulo, J.A., Faias, S., Gomes, A.A., Palma, J., Tomé, J. and Tomé, M. 2015 Predicting site index from climate and soil variables for cork oak (*Quercus suber* L.) stands in Portugal. *New Forests* **46**, 293–307.
- Paulo, J.A., Pereira, H. and Tomé, M. 2017 Analysis of variables influencing tree cork caliper in two consecutive cork extractions using cork growth index modelling. *Agroforest Syst.* **91**, 221–237.
- Pelli, P., Tikkanen, I., Van Brusselen, J., Vilén, T., Weiss, G., Tykkä, S., et al. 2009 *Mid-term evaluation of the implementation of the EU Forest Action Plan. A Study for the DG Agriculture and Rural Development*. AGRI-2008-EVAL-07.
- Penman, J., Gytarsky, M., Hiraishi, T., et al. 2003 Good Practice Guidance for Land Use, Land-Use Change and Forestry. 670 Intergovernmental Panel on Climate Change (IPCC). Institute for Global Environmental Strategies.
- Pereira, H. 2011 *Cork: Biology, Production and Uses*. Elsevier, p. 336.
- Sánchez-González, M., Tomé, M. and Montero, G. 2005 Modelling height and diameter growth of dominant cork oak trees in Spain. *Ann. For. Sci.* **62** (7), 633–643.
- Sánchez-González, M., del Río, M., Cañellas, I. and Montero, G. 2006 Distance independent tree diameter growth model for cork oak stands. *For. Ecol. Manage.* **225** (1), 262–270.

Sánchez-González, M., Gea-Izquierdo, G., Pulido, F., Acácio, V., McCreary, D. and Cañellas, I. 2015 restoration of open oak woodlands in mediterranean ecosystems of Western Iberia and California. In *Restoration of Boreal and Temperate Forests*. 2nd edn. CRC Press, pp. 377–400.

Sierra-Pérez, J., Boschmonart-Rives, J. and Gabarrell, X. 2015 Production and trade analysis in the Iberian cork sector: economic characterization of a forest industry. *Resour. Conserv. Recy.* **98**, 55–66.

Ståhl, G., Cienciala, E., Chirici, G., Lanz, A., Vidal, C., Winter, S., et al. 2012 Bridging national and reference definitions for harmonizing forest statistics. *Forest Sci.* **58** (3), 214–223.

Tomppo, E.O. and Schadauer, K. 2012 Harmonization of national forest inventories in Europe: advances under COST Action E43. *Forest Sci.* **58** (3), 191–200.

Vázquez-Piqué, J. and Pereira, H. 2008 Qué hay que tener en cuenta para elaborar modelos de producción de corcho?: revisión bibliográfica y consideraciones estadísticas (What to take into account to develop cork weight models? review and statistical considerations). *Inv. Agrar. Sist. Recur. For.* **17**, 199–215.

Vallejo, R. 2005 El mapa forestal de España escala 1:50.000 (MFE50) como base del tercer inventario forestal nacional. *Spanish Soc. For. Sci. J.* **19**, 205–210.

Villanueva, J.A. 2004 *Tercer Inventario Forestal Nacional (1997–2007)*. Comunidad de Madrid. Ministerio de Medio Ambiente.

Winter, S., Chirici, G., McRoberts, R.E. and Hauk, E. 2008 Possibilities for harmonizing national forest inventory data for use in forest biodiversity assessments. *Forestry* **81** (1), 33–44.

Wolfslehner, B., Huber, P., Sheppard, J., Pettenella, D., Prokofieva, I., Weiss, G., et al. 2013. *StarTree conceptual paper on multi-purpose trees and NWFP in Europe*. Deliverable D6.3. FP7 Project no. 311919 KBBE.2012.1.2-06, European Commission, 30 p.

## Appendix A Historical trend of commercialized cork production at the national level in Spain (MAGRAMA, 2015)

| Year | Cork weight commercialized (t) |
|------|--------------------------------|
| 1990 | 73 802                         |
| 1991 | 72 146                         |
| 1992 | 72 090                         |
| 1993 | 89 938                         |
| 1994 | 62 797                         |
| 1995 | 57 509                         |
| 1996 | 90 025                         |
| 1997 | 71 930                         |
| 1998 | 122 257                        |
| 1999 | 62 631                         |
| 2000 | 59 581                         |
| 2001 | 58 099                         |
| 2002 | 67 486                         |
| 2003 | Not available                  |
| 2004 | 20 973                         |
| 2005 | 61 504                         |
| 2006 | 60 728                         |
| 2007 | 62 393                         |
| 2008 | 62 393                         |
| 2009 | 50 164                         |
| 2010 | 60 736                         |
| 2011 | 55 905                         |
| 2012 | 49 133                         |

MAGRAMA, 2015. *Anuario de Estadística Forestal. Avance para 2012*. [http://www.magrama.gob.es/es/biodiversidad/estadisticas/forestal\\_anuarios\\_todos.aspx](http://www.magrama.gob.es/es/biodiversidad/estadisticas/forestal_anuarios_todos.aspx)
